# Supplementary material
Source: Springer Nature journal article supplement (https://www.springermedizin.de/resource/supplementary/12889_2009_2048_MOESM1_ESM.pdf/9484422)

**Affordability**

Design processes  
and intervention  
contents

Trust

**Availability**

**Acceptability**

**ccess**

Health system factors ↔ Individual/household

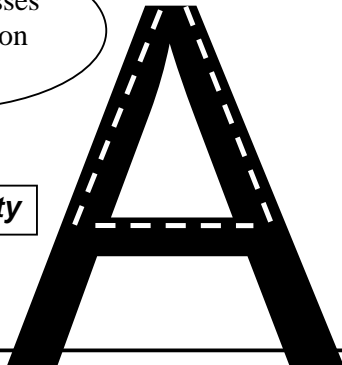

Supplement: MOESM1 [file 9484422]
